# Supplementary material for: Arabidopsis membrane-associated acyl-CoA-binding protein ACBP1 is involved in stem cuticle formation
Source: PubMed Central journal article supplement (PMC4157719; doi:10.1093/jxb/eru304), 2014-07-22
Supplement: supp_eru304_Supplementary_data.pdf [file supp_eru304_Supplementary_data.pdf]

## **Supplementary data**

### **Arabidopsis membrane-associated acyl-CoA-binding protein ACBP1 is involved in stem cuticle formation**

Yan Xue, Shi Xiao, Juyoung Kim, Shiu-Cheung Lung, Liang Chen, Julian A. Tanner,  
Mi Chung Suh, Mee-Len Chye

## Supplementary Figure S1.

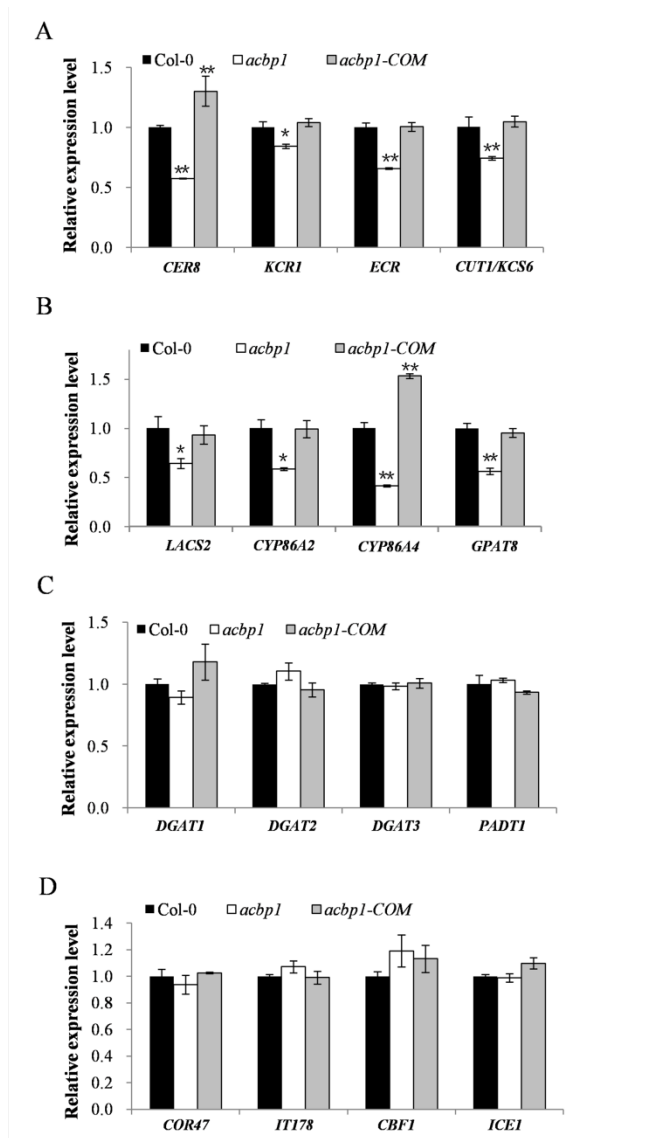

**Figure S1.** Expression analysis of wax biosynthetic genes (A), cutin biosynthetic genes (B), and genes with no implication on cuticle formation (triacylglycerol biosynthetic genes (C) and cold-related genes (D)) in stems of Col-0, the *acbp1* mutant and *acbp1-COM* line. Asterisks denote significant differences from the wild type (\*  $P < 0.05$ , \*\*  $P < 0.01$ ). Values are means  $\pm$  SE (n = 3).

Supplementary Figure S2.

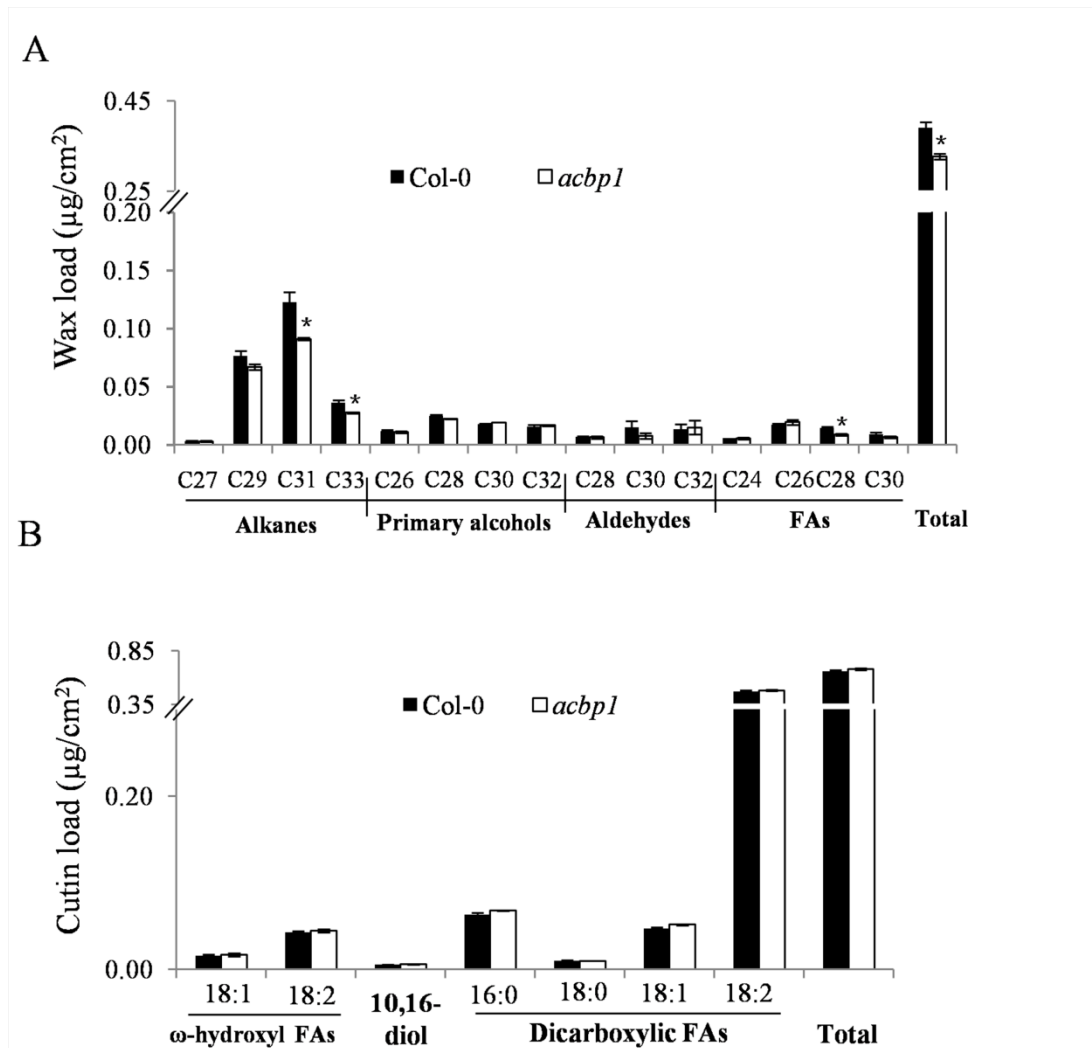

**Figure S2.** Cuticular wax (A) and cutin monomer (B) composition and amount in leaves of Col-0 and the *acbp1* mutant. Four-week-old leaves were used for wax and cutin analysis by gas chromatography (GC)-flame ionization detector and GC-mass spectrometry. FA, fatty acid; 10,16-diol, C16-10,16-dihydroxyl fatty acids. Asterisks denote significant differences from the wild type (\*  $P < 0.05$ ). Values are means  $\pm$  SE (n = 3).

**Supplementary Table S1.** Sequences of gene-specific primers for qRT-PCR.

| Name   | Sequence (5'→3')          | Target gene                       |
|--------|---------------------------|-----------------------------------|
| ML1124 | CCCGCTATGTATGTCGC         | At3g18780<br>( <i>ACTIN2</i> )    |
| ML1125 | AAGGTCAAGACGGAGGAT        |                                   |
| ML1824 | AGGCAAACATCACCACAATAGG    | At1g68530<br>( <i>CUT1/KCS6</i> ) |
| ML1825 | CTCGTCGATCACCGCTCTG       |                                   |
| ML1826 | AGCACCTTTGAGCCCTGAGA      | At2g47240<br>( <i>CER8</i> )      |
| ML1827 | AACCGCTGGAATACCGACTG      |                                   |
| ML1828 | ATTCCACGCGGTTTCCTCTTC     | At3g55360<br>( <i>ECR</i> )       |
| ML1829 | GGCTTTCCATCTTTTCCATCAA    |                                   |
| ML1832 | ACCCACTTGGCTCCTCATCTC     | At1g67730<br>( <i>KCRI</i> )      |
| ML1833 | GCTTTACCGATTCCGCTCTGTTG   |                                   |
| ML1917 | TAATACACGTAAGCAAGAAT      | At4g00360<br>( <i>CYP86A2</i> )   |
| ML1918 | GTCGTGATGAGCCAGAAAAACC    |                                   |
| ML1919 | GGCTCTTCCAACGCAAAAACC     | At1g01600<br>( <i>CYP86A4</i> )   |
| ML1920 | CGAACGCCAATCCGCAAATG      |                                   |
| ML1933 | GATTGTGCCAGTAGCGATGAA     | At4g00400<br>( <i>GPAT8</i> )     |
| ML1934 | TCTTGCCACCACCGTTGAC       |                                   |
| ML1937 | AACGCAGCAATTTCCGGTCCAG    | At1g49430<br>( <i>LACS2</i> )     |
| ML1938 | AATGTCGCCACGCCAGTATCC     |                                   |
| ML2026 | GGAGGGCGAGAGAGAGTCCACTT   | At2g19450<br>( <i>DGAT1</i> )     |
| ML2027 | CCAATCTCGCAGCGATCTGAAC    |                                   |
| ML2028 | CCGAGCTGAGGAACATTCAAATCA  | At3g51520<br>( <i>DGAT2</i> )     |
| ML2029 | CGACCATATTTGCTACGATGATCGA |                                   |
| ML2030 | GGTCTTGATCCTGAAGCTGGTTTG  | At1g48300<br>( <i>DGAT3</i> )     |
| ML2031 | TCAGTCATCTTCTTCATGGCTTTGG |                                   |
| ML2032 | TGCTGAAGCAAAGGATGTTGCA    | At5g13640<br>( <i>PDAT1</i> )     |
| ML2033 | CCTTCTCCGGTGACCAATCAAG    |                                   |
| ML1716 | GTCCACGCCGTTGGTTGT        | At1g20440<br>( <i>COR47</i> )     |
| ML1717 | AATCCCCTTCTTCTCCTCCG      |                                   |
| ML1718 | TTCCACCAGGGACAAAGG        | At5g52310<br>( <i>LTI78</i> )     |
| ML1719 | CATCGTGTCCGTAAGAGGC       |                                   |
| ML1785 | GGACTTCCAACCGCTGAG        | At4g25490<br>( <i>CBF1</i> )      |
| ML1786 | CAAGCCGAGTCAGCGAAGTT      |                                   |
| ML1901 | GATTCTTGCTGCTCGGTCACT     | At3g26744<br>( <i>JCE1</i> )      |
| ML1902 | CCATTAGCAGGACTACCAAAAACC  |                                   |

The genes implicated in wax biosynthesis tested in qRT-PCR were *CUT1/KCS6*, *CER8*, *ECR* and *KCRI*. The genes implicated in cutin biosynthesis tested were

*CYP86A2*, *CYP86A4*, *GPAT8* and *LACS2*. The genes with no implication in cuticle formation tested included triacylglycerol biosynthetic genes (*DGAT1*, *DGAT2*, *DGAT3* and *PADT1*) and cold-related genes (*COR47*, *LTI78*, *CBF1* and *ICE1*).

**Supplementary Table S2.** Mass-to-charge ratios (m/z) of cutin compounds in mass spectrometry.

| <b>Cutin compound</b>                 | <b>Mass-to-charge ratios (m/z)</b> |
|---------------------------------------|------------------------------------|
| C17:0-FA (internal standard)          | 284                                |
| C15:0 cycloketone (internal standard) | 282                                |
| C18:1-FA                              | 296                                |
| C18:2-FA                              | 294                                |
| C10,16-dihydroxyl fatty acids         | 343                                |
| C16:0-DCA                             | 314                                |
| C18:0-DCA                             | 342                                |
| C18:1- DCA                            | 339                                |
| C18:2-DCA                             | 337                                |

FA, fatty acid; DCA, dicarboxylic fatty acid.
